# Supplementary material
Source: HighWire-hosted journal article supplement (https://www.annfammed.org/highwire/filestream/8705/field_highwire_adjunct_files/0/Teepe_Supp_App.pdf)
Supplement: Teepe_Supp_App.pdf [file Teepe_Supp_App.pdf]

**Supplementary materials for:**

Teepe J, Broekhuizen BD, Loens K, et al. Disease course of lower respiratory tract infection with a bacterial cause. *Ann Fam Med*. 2016;14(6):534-539.

## Supplemental Appendix 1. Laboratory manual

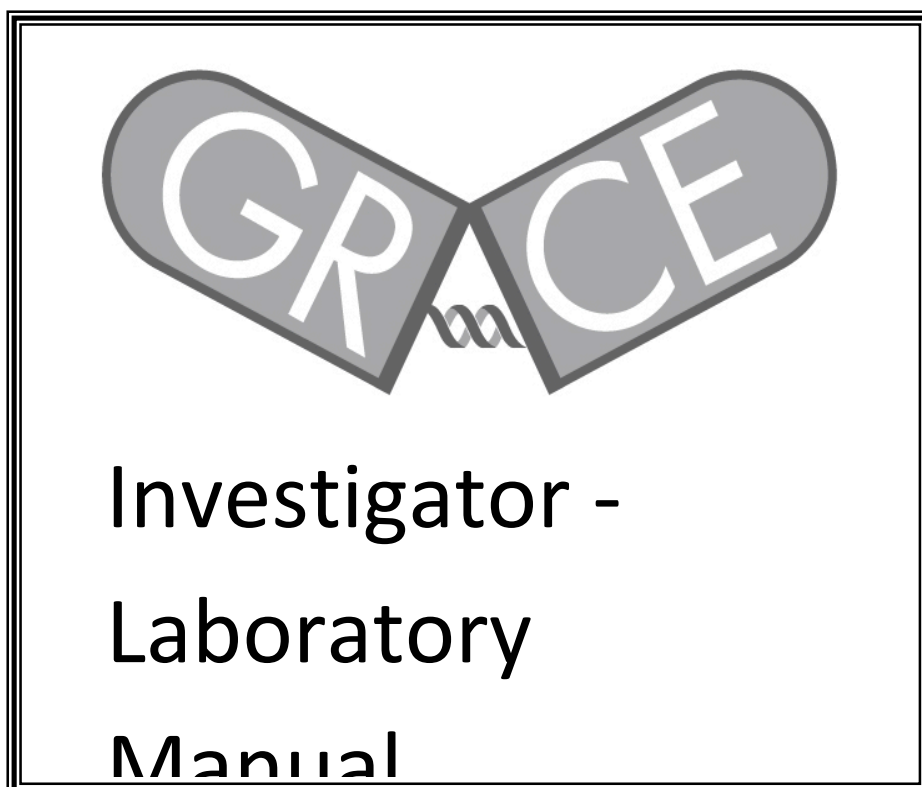

|                     |                                                                                        |
|---------------------|----------------------------------------------------------------------------------------|
| Project acronym:    | GRACE                                                                                  |
| Project full title: | Genomics to combat Resistance against Antibiotics in Community-acquired LRTI in Europe |
| Document type:      | Investigator - Laboratory Manual                                                       |
| Document status:    | Version 3.3                                                                            |
| Release date:       | 31 May 2007                                                                            |

Antibiotic use was defined as patient reported intake of antibiotics (one dose or more) for at least 5 days in the first 10 days after the index GP consultation.

Data are presented as number (%), unless mentioned otherwise. SD = standard deviation.

\* Pulmonary co morbidity = history of COPD, asthma or other lung disease. Cardiac co morbidity = history of heart failure, ischemic heart disease or other heart disease. DM = diabetes mellitus.

† Presented in days.

‡ Score for 14 patients' GP-recorded symptoms summed and scaled to range between 0 and 100 at day 1.

§ P value compared included versus excluded patients.

## Table of Contents

|                                                                                                        |    |
|--------------------------------------------------------------------------------------------------------|----|
| <b>1. INTRODUCTION</b>                                                                                 | 5  |
| 1.1 Sampling material supplied by the Central Lab (University of Antwerp, Belgium)                     | 5  |
| 1.2 Documents                                                                                          | 5  |
| <b>2. STUDY PROCEDURES AND OBSERVATIONS</b>                                                            | 6  |
| 2.1 Overview of samples to be taken per visit                                                          | 6  |
| 2.2 Overview of handlings to be performed by the local lab                                             | 6  |
| 2.3 Overview of analysis to be performed by the central lab or by the labs from the other Workpackages | 7  |
| <b>3. LABORATORY TEST ASSESSMENTS</b>                                                                  | 8  |
| 3.1 Local Laboratory                                                                                   | 8  |
| 3.2 Central Laboratory (UA)                                                                            | 9  |
| <b>4. SAMPLE HANDLING PROCEDURES</b>                                                                   | 10 |
| 4.1 Investigator Requisition Form                                                                      | 10 |
| 4.2 Material Preparation                                                                               | 10 |
| 4.3 Overview of Sample Handling per Visit                                                              | 11 |
| 4.4 Sampling Instructions                                                                              | 14 |
| 4.4.1 For investigator                                                                                 | 14 |
| 4.4.2 For Local Laboratory                                                                             | 16 |
| <b>5. FROZEN SAMPLE SHIPMENT PROCEDURE</b>                                                             | 18 |
| <b>6. REPORTING</b>                                                                                    | 19 |
| 6.1 Investigator                                                                                       | 19 |
| 6.2 Local Laboratory                                                                                   | 20 |
| 6.3 Central Laboratory                                                                                 | 21 |
| <b>7. CONTACT PERSONS</b>                                                                              | 23 |

---

|                   |                                                             |           |
|-------------------|-------------------------------------------------------------|-----------|
| <b><u>7.1</u></b> | <b><u>Central Lab –University Antwerp – UA</u></b>          | <b>23</b> |
| <b><u>7.2</u></b> | <b><u>National Network co-ordinators and Local Labs</u></b> | <b>23</b> |
| <b><u>8.</u></b>  | <b><u>ANNEXES</u></b>                                       | <b>25</b> |
| <b><u>8.1</u></b> | <b><u>Annex 1: Investigator Requisition Form</u></b>        | <b>25</b> |
| <b><u>8.2</u></b> | <b><u>Annex 2: Local Laboratory Requisition Form</u></b>    | <b>26</b> |
| <b><u>8.3</u></b> | <b><u>Annex 3: Sputum Result Form</u></b>                   | <b>27</b> |

## INTRODUCTION

For WP 9, GRACE Contract no. LSHM-CT-2005-518226, the Central Lab has provided you with:

- This Investigator - Laboratory Manual
- An Investigator Requisition Form and a Local Lab Requisition Form
- Visit specific sampling kits for:

### **Observational study**

- **Visit 1** (Pre-Treatment/Day 0)
- **Visit 2** (4 weeks after visit 1/Day 1)

### **Control group**

- **Visit 0**

### ***Sampling material supplied by the Central Lab (University of Antwerp, Belgium)***

- Serum tube and serum transfer tube
- EDTA blood sampling tube
- Sputum container
- Nasopharyngeal swab with Virus Transport Medium
- Nasopharyngeal swab with Amies medium
- Microbanks with pearl medium (only for use in local labs)

## Documents

The material is accompanied by two Requisition Forms: **An Investigator Requisition Form** (annex 1) and **A Local Lab Requisition Form** (annex 2).

### **For the investigator**

- **The investigator** has to fill in the **Investigator Requisition Form** on the moment of the sampling. The **Investigator Requisition Form** will be kept by the investigator and a fax forwarded to the local National Network Facilitator (NNF) within 24 h after sampling. The **unfilled Local Lab Requisition Form** is accompanied by the samples, the unused sampling material and the unused labels, at the moment of the transport to the local lab

### **For the Local Lab**

- The Local lab has to fill in the **Local Lab Requisition Form** on the moment of arrival of the samples. The **Local Lab Requisition Form** will be kept by the local lab and a fax forwarded to the local National Network Facilitator (NNF) within 24 h after arrival of the samples.

Please make sure that the Forms are filled in completely and legibly. If an error is made, cross out the mistake, write the correct information and initial and date the change.

## STUDY PROCEDURES AND OBSERVATIONS

For all assessments to be performed per visit, please refer to the Sample Handling Procedures in chapter 4.

### Overview of samples to be taken per visit

|                                                                 | Observational study |                         | Control group |
|-----------------------------------------------------------------|---------------------|-------------------------|---------------|
| Sample                                                          | V1                  | V2                      | V1            |
| Serum                                                           | S                   | S                       |               |
| EDTA blood                                                      | S                   |                         | S             |
| Sputum                                                          | S                   |                         |               |
| Nasopharyngeal swab with virus transport medium                 | S                   | S                       | S             |
| Nasopharyngeal swab with Amies medium                           | S                   | S                       | S             |
| V1 = Day 0 (Pre-treatment)<br>V2 = Day 1 (4 weeks after visit1) |                     | S = Samples to be taken |               |

### Overview of handlings to be performed by the local lab

| Sample                                                          | Handling, Preparation or Test                                                                           |
|-----------------------------------------------------------------|---------------------------------------------------------------------------------------------------------|
| Serum                                                           | Preparation of the serum and storage of the serum tube preferable at $-70^{\circ}\text{C}$              |
| EDTA blood                                                      | Store tube preferable at $-70^{\circ}\text{C}$                                                          |
| Sputum                                                          | Direct microscopy                                                                                       |
|                                                                 | Gram Stain                                                                                              |
|                                                                 | Culture of <i>S. pneumoniae</i> and <i>Haemophilus spp.</i>                                             |
|                                                                 | Preparation of 2 Microbanks per <i>Streptococcus pneumoniae</i> and <i>Haemophilus species</i> isolate. |
| Nasopharyngeal swab with virus transport medium                 | Store the swab preferable at $-70^{\circ}\text{C}$                                                      |
| Nasopharyngeal swab with Amies medium                           | Store the swab preferable at $-70^{\circ}\text{C}$                                                      |
| V1 = Day 0 (Pre-treatment)<br>V2 = Day 1 (4 weeks after visit1) |                                                                                                         |

## Overview of analysis to be performed by the central lab or by the labs from the other Workpackages

| Sample                                                          | Test                                                                                                                                                                                 | Observational study |    | Control group |
|-----------------------------------------------------------------|--------------------------------------------------------------------------------------------------------------------------------------------------------------------------------------|---------------------|----|---------------|
|                                                                 |                                                                                                                                                                                      | V1                  | V2 | V1            |
| Serum                                                           | Serology for <i>M. pneumoniae</i> , <i>C. pneumoniae</i> and <i>L. pneumophila</i>                                                                                                   | T                   | T  |               |
|                                                                 | C-reactive protein                                                                                                                                                                   | T                   | T  |               |
|                                                                 | Procalcitonin                                                                                                                                                                        | T                   | T  |               |
| EDTA blood                                                      | Human Genetics                                                                                                                                                                       | T                   |    | T             |
| Sputum                                                          | Susceptibility testing on <i>S. pneumoniae</i> and <i>Haemophilus spp.</i>                                                                                                           | T                   |    |               |
|                                                                 | Molecular analysis on <i>S. pneumoniae</i> and <i>Haemophilus spp.</i>                                                                                                               | T                   |    |               |
| Nasopharyngeal Swab in Viral transport medium                   | Viral culture                                                                                                                                                                        | T                   |    | T             |
|                                                                 | Antigen tests                                                                                                                                                                        | T                   |    | T             |
|                                                                 | Virus discovery                                                                                                                                                                      | T                   | T  | T             |
|                                                                 | PCR for <i>Chlamydia pneumoniae</i> , <i>Legionella pneumophila</i> , <i>Mycoplasma pneumoniae</i> , <i>Bordetella sp.</i> , <i>Streptococcus pneumoniae</i> and respiratory viruses | T                   | T  | T             |
| Nasopharyngeal swab in Amies medium                             | PCR for atypical bacteria                                                                                                                                                            | T                   | T  | T             |
|                                                                 | Growth of <i>Streptococcus pneumoniae</i> and <i>Haemophilus spp.</i>                                                                                                                | T                   |    |               |
| V1 = Day 0 (Pre-treatment)<br>V2 = Day 1 (4 weeks after visit1) |                                                                                                                                                                                      | T = Perform test    |    |               |

## LABORATORY TEST ASSESSMENTS

To perform and/or to prepare the specimens for each test, please refer to the detailed description of each Laboratory Test in chapter 4.4 (Sampling Instructions)

### Local Laboratory

- In your Local Laboratory the following tests are to be performed if the sample is present:

- Sputum : Direct microscopy, Gram stain and culture
- 

If sputum cultures are positive for *S. pneumoniae* and/or *Haemophilus spp*

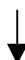

Preparation of Microbanks for the Central Lab

- In your Local Laboratory the following specimen have to be prepared for the Central Lab, if the sample is present:
  - A serum sample (in the 10 ml serum transfer tube)
  - Microbanks with sputum pathogens *S. pneumoniae* and/or *Haemophilus spp.* (see above)
- Additionally the following samples have to be stored until shipment to the Central Lab, if the sample is present:
  - An serum sample (see above)
  - An EDTA blood sample
  - Nasopharyngeal swab in virus transport medium
  - Nasopharyngeal swab in Amies medium
  - Microbanks (see above)

After preparation, put the samples, together with the unused labels, in a zip-lock bag. Store them in your freezer, preferably at -70°C until shipment to the Central Lab.

Only in case you do not have the facilities to freeze at -70°C you can store them at -20°C.



## Central Laboratory (UA)

The Central Laboratory will perform the following tests on your collected samples:

- Serology for *M. pneumoniae*, *C. pneumoniae* and *L. pneumophila*
- CRP and procalcitonin in serum
- Transfer EDTA blood specimen to Workpackage 4 (WP4) for human genetics.
- Susceptibility testing on *S. pneumoniae* and *Haemophilus spp.*
- Transfer *S. pneumoniae* and *Haemophilus spp.* strains to WP6 and WP7, respectively, for molecular analysis
- PCR for *C. pneumoniae*, *L. pneumophila*., *M. pneumoniae*, *B. pertussis*, *S.pneumoniae* and respiratory viruses
- Aliquot PCR material and transfer to WP3 and WP5 for virus detection and virus discovery respectively
- Aliquot virus transport medium and transfer to WP3 for viral culture and antigen tests and to WP5 for virus discovery
- PCR of atypical bacteria using an nasopharyngeal swab in Amies transport medium
- Culturing *S. pneumoniae* and *Haemophilus spp.* using a nasopharyngeal swab in Amies transport medium

## **SAMPLE HANDLING PROCEDURES**

### ***Investigator Requisition Form***

First complete the next information on the Investigator Requisition Form (Annex 1):

- Patient study number (**use same label as in CRF**, see 4.2 Material Preparation)
- Patient gender (F/M)
- Date of Birth (dd/mm/yyyy)
- Collection Date (dd/mm/yyyy)
- Collection Time (24 hours clock)
- Visit number (tick the right box)
- Specimens collected (tick the right box)

### ***Material Preparation***

#### **Observational study**

**Visit 1** => take the observational study visit 1 sampling kit and open the big zip-lock bag.

**Visit 2** => take the observational study visit 2 sampling kit and open the big zip-lock bag.

#### **For Control group**

**Visit 0** => take the control group visit 1 sampling kit and open the big zip-lock bag.

Each tube has to be identified with a label. Labels are coded with a patient study number and a visit number.

Labels are to be stuck vertically on the tubes.

The same labels are used for the Patient Registration Form, Case Record Form (CRF), Investigator Requisition Form, Local Lab Requisition Form, ...
